# Supplementary material
Source: ML conference proceedings conference paper supplement (https://proceedings.mlr.press/v32/pacheco14.html)

---

## D-PMP Pose Estimation Results

---

**Jason Pacheco**

PACHECOJ@CS.BROWN.EDU

Department of Computer Science, Brown University, Providence, RI 02912, USA

**Silvia Zuffi**

SILVIA.ZUFFI@TUE.MPG.DE

Max Planck Institute for Intelligent Systems, 72076 Tübingen, Germany; ITC-CNR, 20133 Milan, Italy

**Michael J. Black**

BLACK@TUEBINGEN.MPG.DE

Max Planck Institute for Intelligent Systems, 72076 Tübingen, Germany

**Erik Sudderth**

SUDDERTH@CS.BROWN.EDU

Department of Computer Science, Brown University, Providence, RI 02912, USA

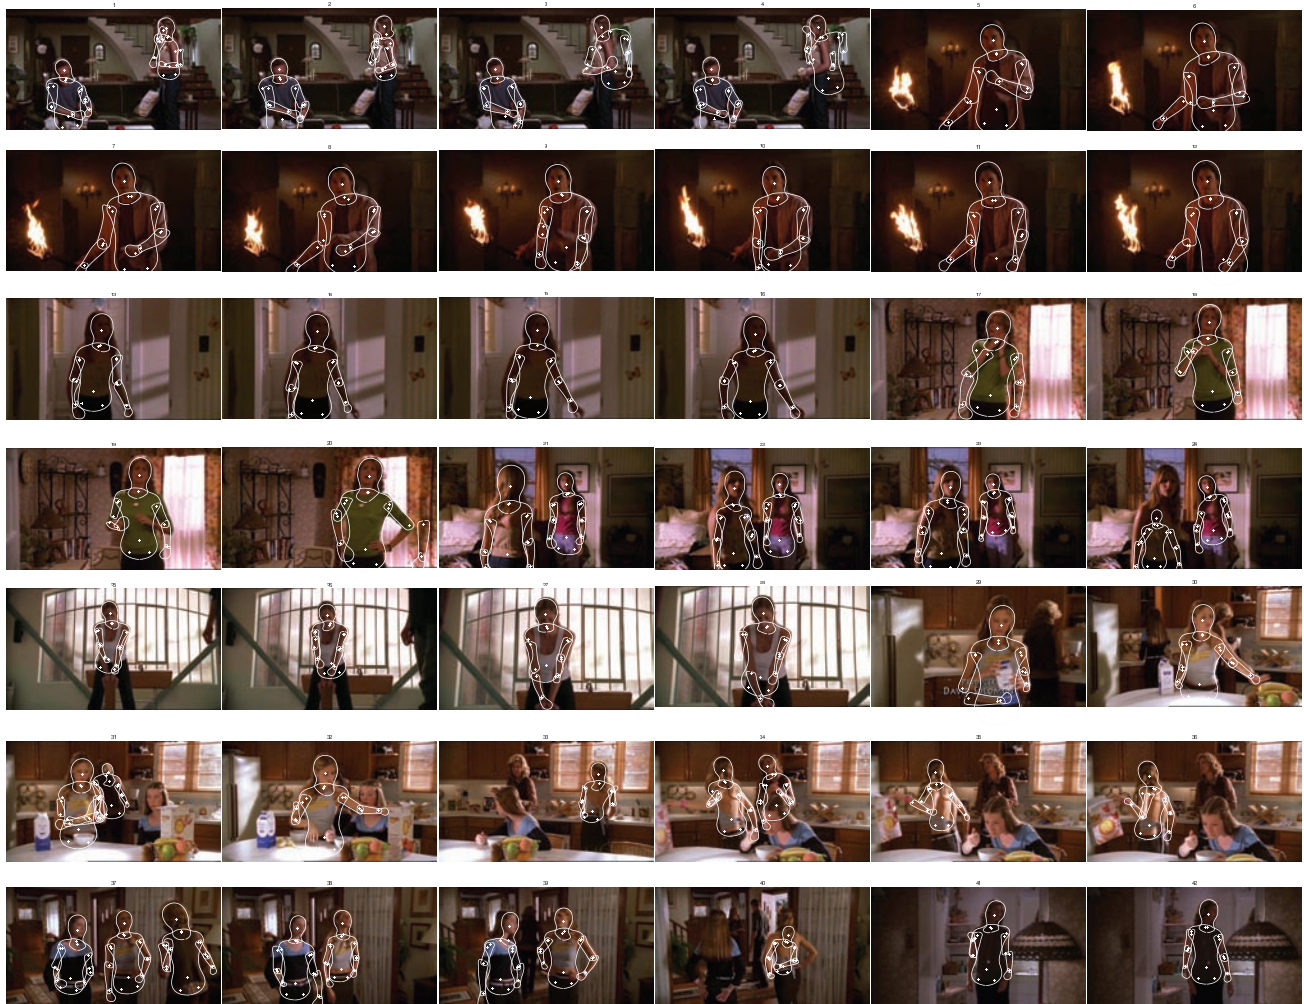

# Diverse Particle Max-Product

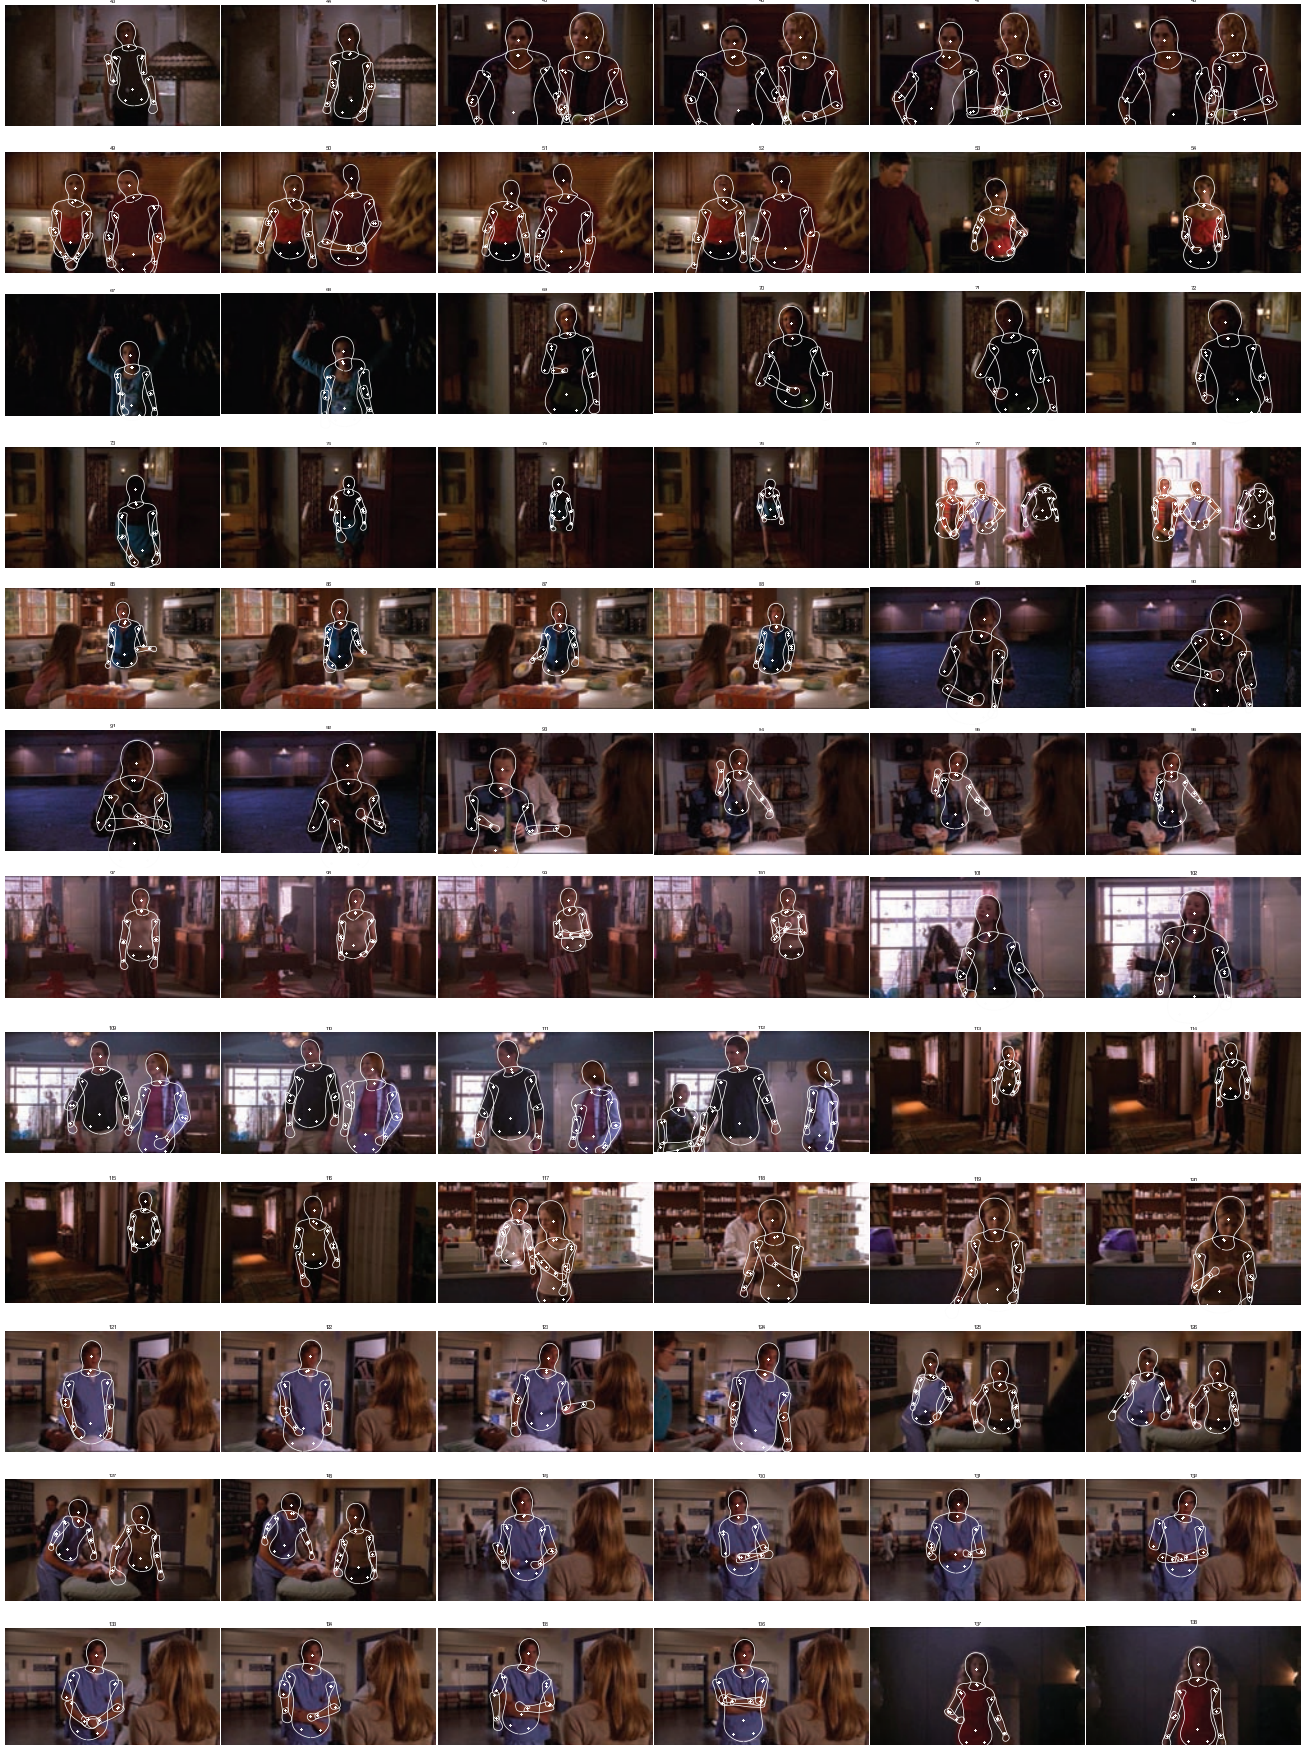

# Diverse Particle Max-Product

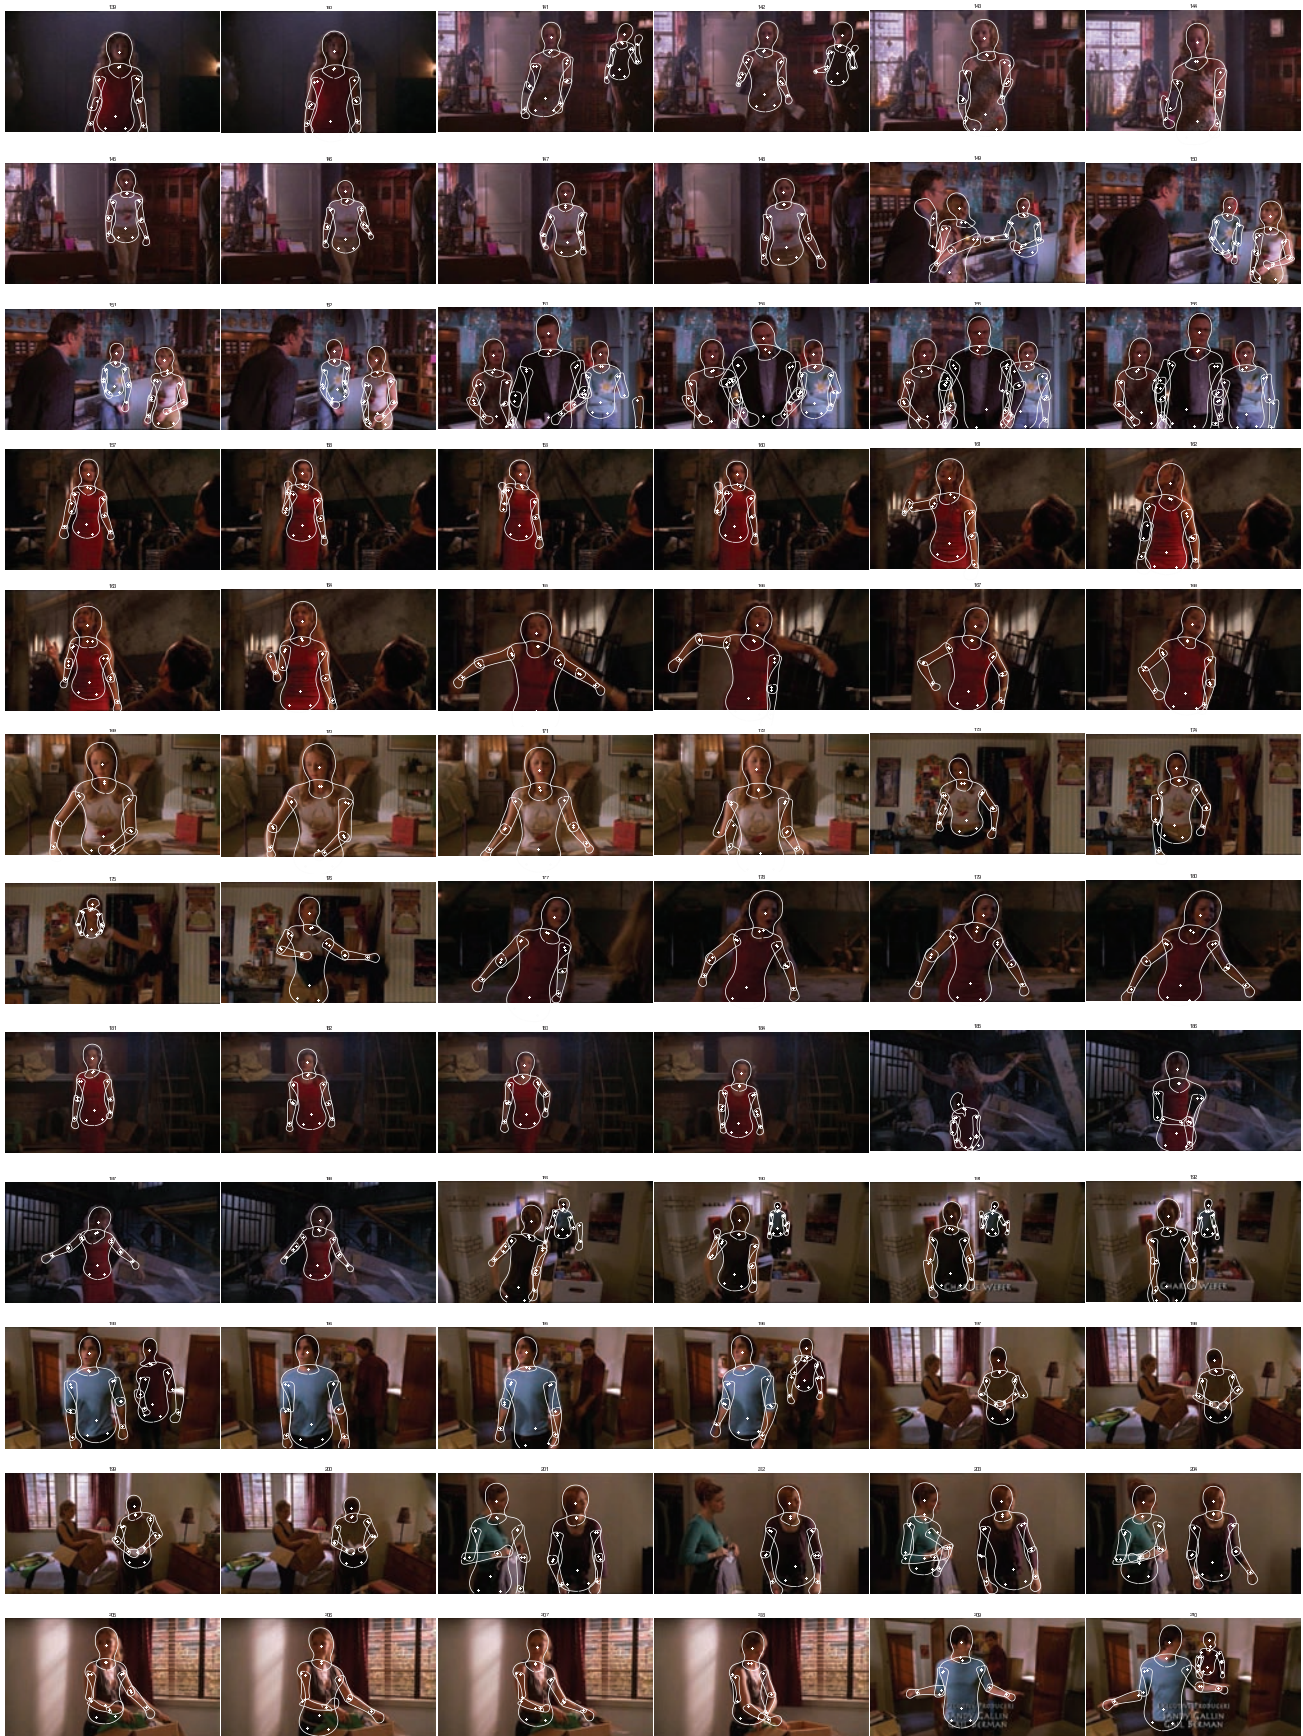

# Diverse Particle Max-Product

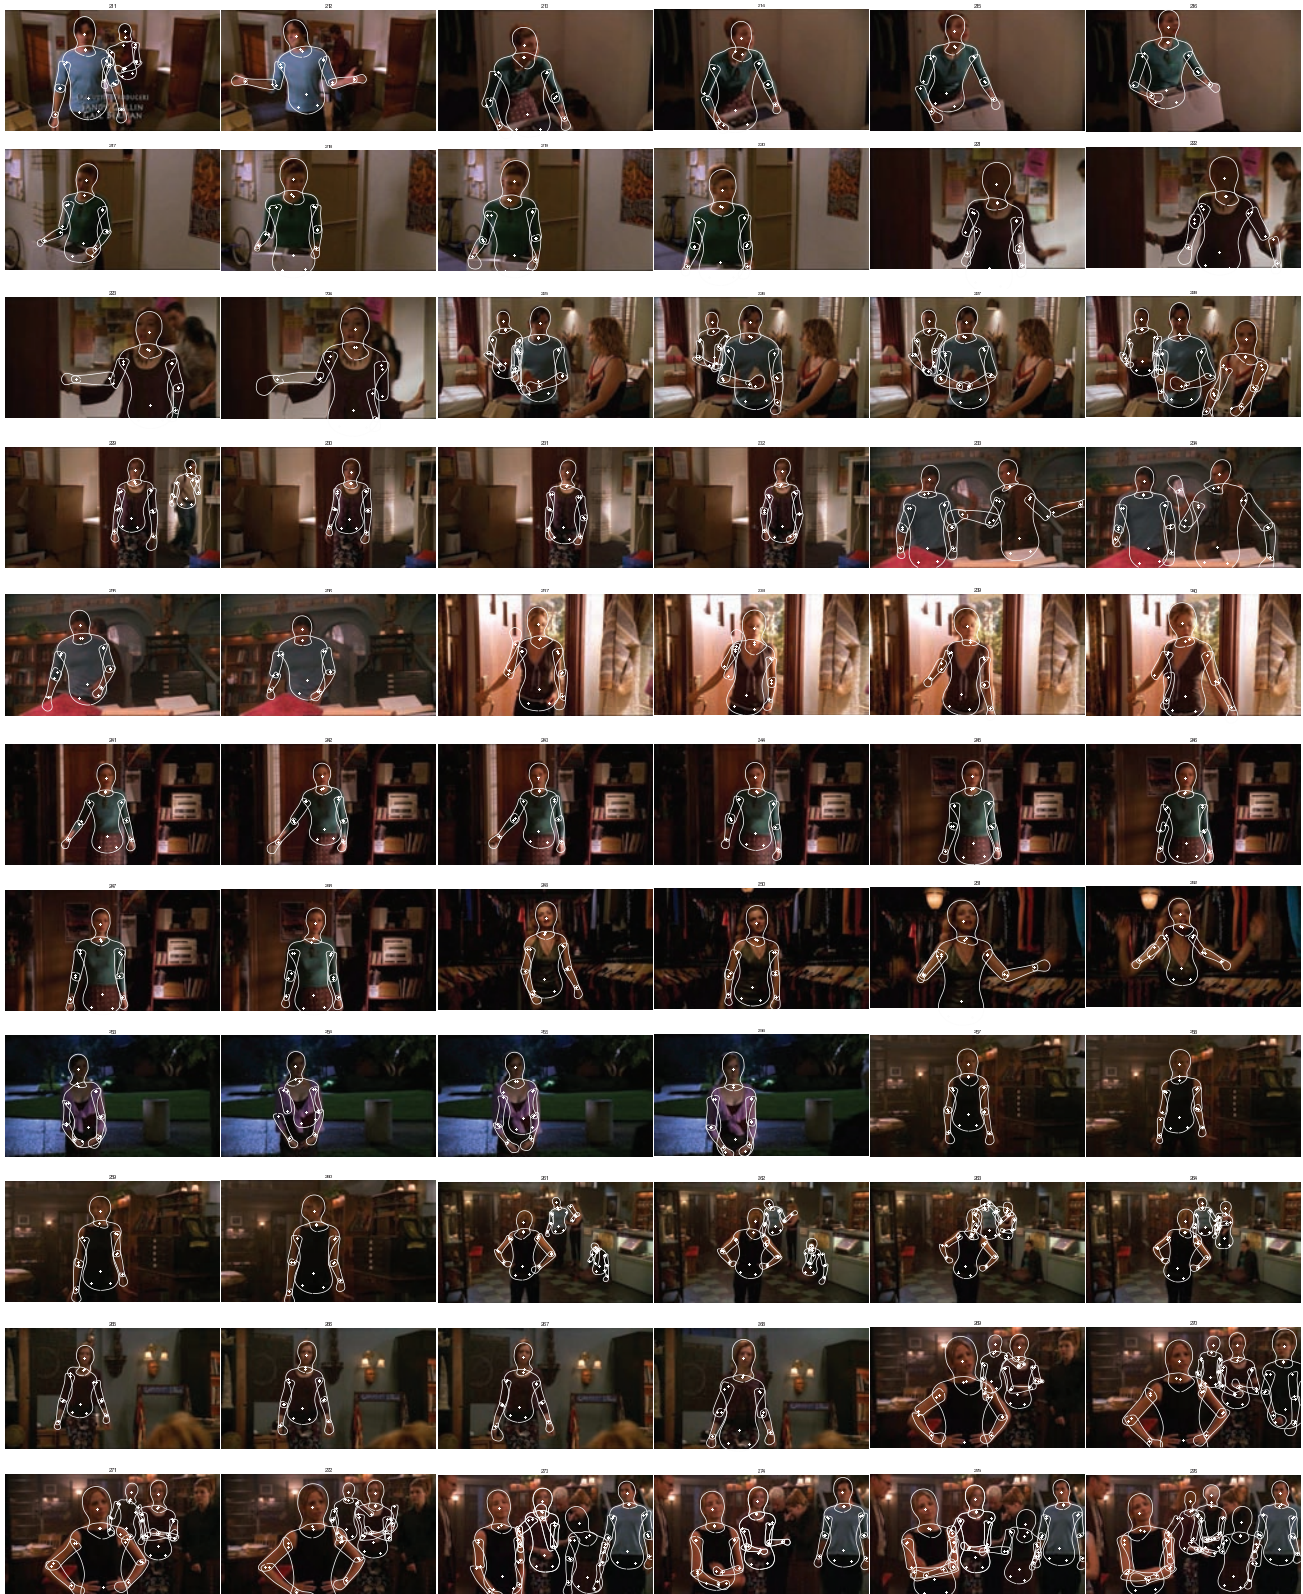

Supplement: Supplementary file 1 [file pacheco14-supp.zip]
